# Supplementary material
Source: PubMed Central journal article supplement (PMC2885223)
Supplement: supp_M110.107607_jbc.M110.107607-1.pdf [file supp_M110.107607_jbc.M110.107607-1.pdf]

**A** Probe : TxRE1

Competitors :

Homologous TxRE1      TxRE1-154me      Heterologous HIV-1 NF- $\kappa$ B

Nuclear extracts : PBMCs

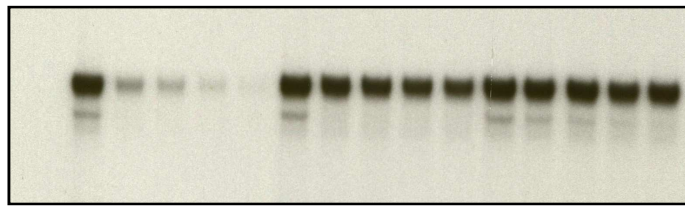

1 2 3 4 5 6 7 8 9 10 11 12 13 14 15

**B** Probe : TxRE2

Competitors :

Homologous TxRE2      TxRE2-129me      Heterologous HIV-1 NF- $\kappa$ B

Nuclear extracts : PBMCs

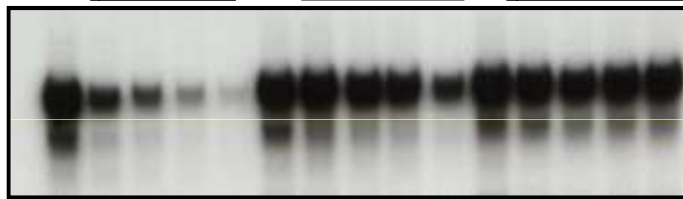

1 2 3 4 5 6 7 8 9 10 11 12 13 14 15
